# Supplementary material for: Facile and eco-friendly synthesis of hydrogen bonding-rich bio-based bisbenzoxazine resins with low surface free energy, strong adhesion strength and high thermal stability
Source: Royal Society of Chemistry journal article supplement (doi:10.1039/d3me00066d), 2023-10-17
Supplement: d3me00066d1.pdf [file d3me00066d1.pdf]

*Supporting Information*

**Facile and Eco-Friendly Synthesis of Hydrogen Bonding-Rich Bio-Based Bisbenzoxazine Resins with Low Surface Free Energy, Strong Adhesion Strength and High Thermal Stability**

Yin Lu,<sup>a</sup> Nan Li,<sup>a</sup> Yaliang Peng,<sup>a</sup> Mohamed Gamal Mohamed,<sup>\*b</sup> Shiao-Wei Kuo<sup>b</sup> and Kan Zhang<sup>\*a</sup>

<sup>a</sup> Research School of Polymeric Materials, School of Materials Science and Engineering, Jiangsu University, Zhenjiang 212013, China.

<sup>b</sup> Department of Materials and Optoelectronic Science and College of Semiconductor and Advanced Technology Research, National Sun Yat-Sen University, Kaohsiung 804, Taiwan.

\*: To whom correspondence should be addressed:

Mohamed Gamal Mohamed: mgamal.eldin12@yahoo.com

Kan Zhang: zhangkan@ujs.edu.cn

**Tables of Contents**

|                                                             |            |
|-------------------------------------------------------------|------------|
| <b>S1. <sup>1</sup>H NMR Spectra</b>                        | <b>S2</b>  |
| <b>S2. <sup>13</sup>C NMR Spectra of Monomers</b>           | <b>S4</b>  |
| <b>S3. FT-IR Spectra of Monomers</b>                        | <b>S6</b>  |
| <b>S4. HR-MS Spectra of Monomers</b>                        | <b>S7</b>  |
| <b>S5. DSC Analysis at different temperature ramp rates</b> | <b>S9</b>  |
| <b>S6. Structures of BA-a and poly(BA-a)</b>                | <b>S11</b> |
| <b>S7. Detailed DFT optimized structure</b>                 | <b>S12</b> |

## S1. $^1\text{H}$ NMR Spectra

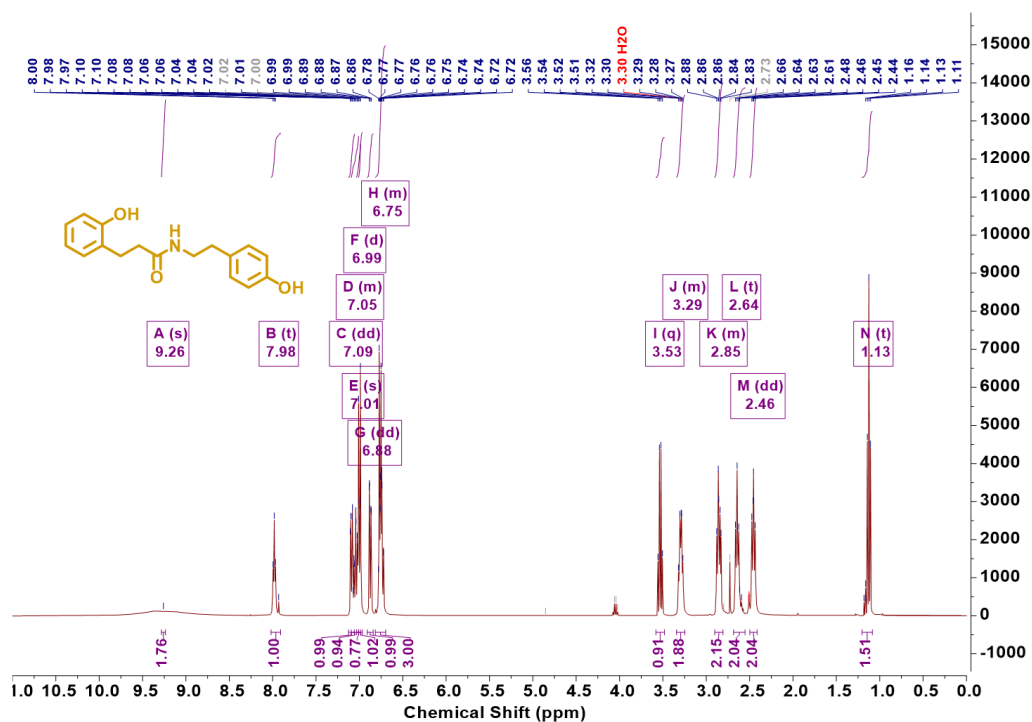

Figure S1.  $^1\text{H}$  NMR spectrum of the product from the reaction between dihydrocoumarin and tyramine ( $\text{DMSO-}d_6$ ).

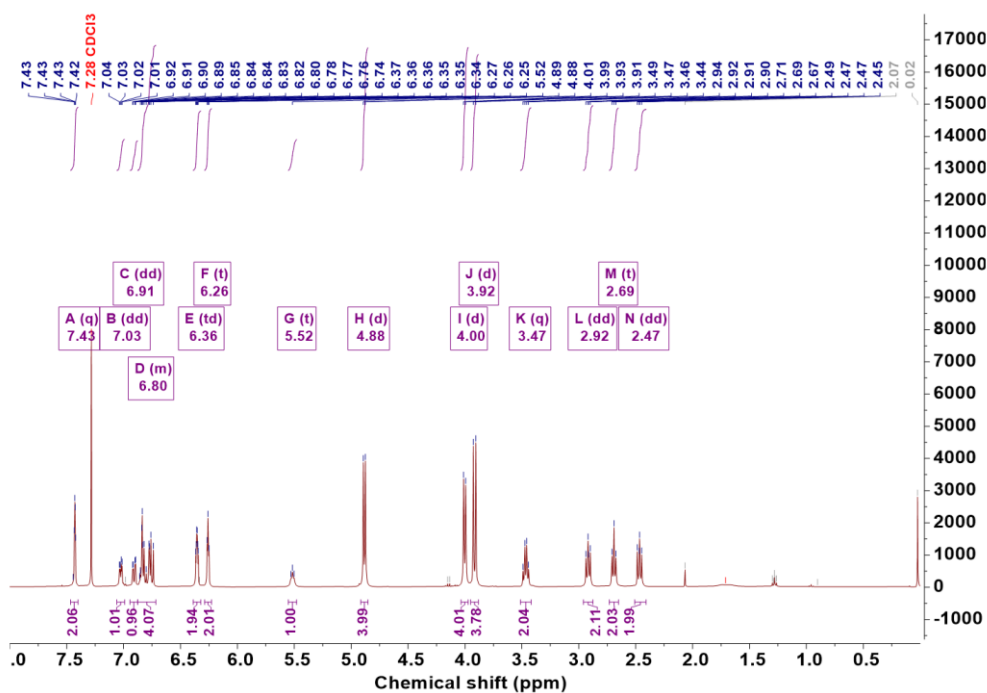

Figure S2.  $^1\text{H}$  NMR spectrum of **DcTa-fa** ( $\text{CDCl}_3$ ).

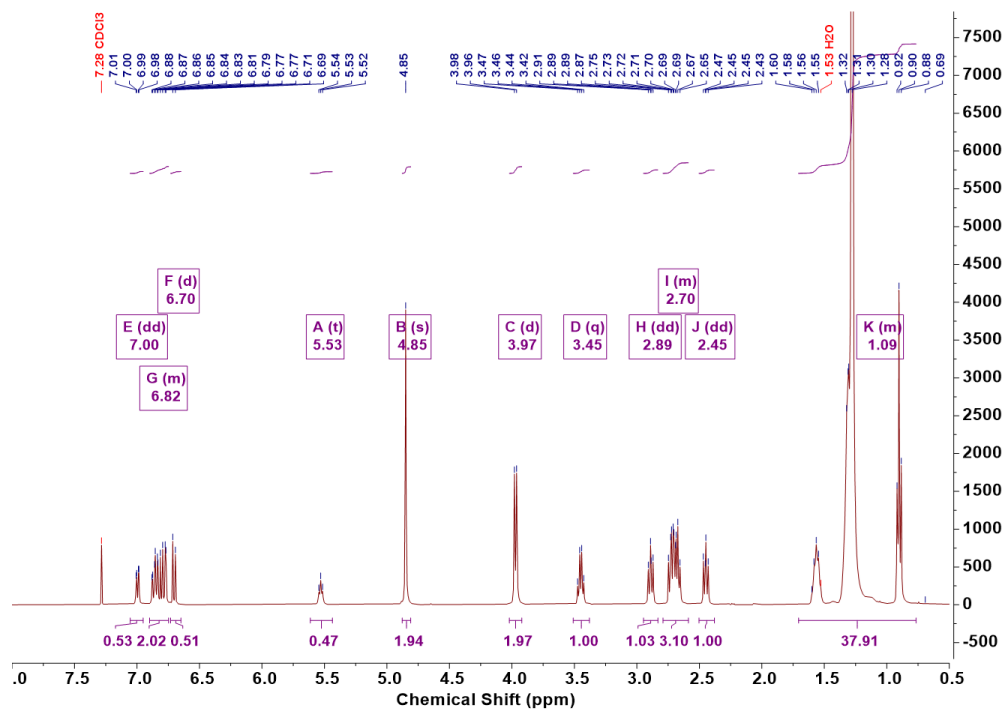

Figure S3. <sup>1</sup>H NMR spectrum of DcTa-sa (CDCl<sub>3</sub>).

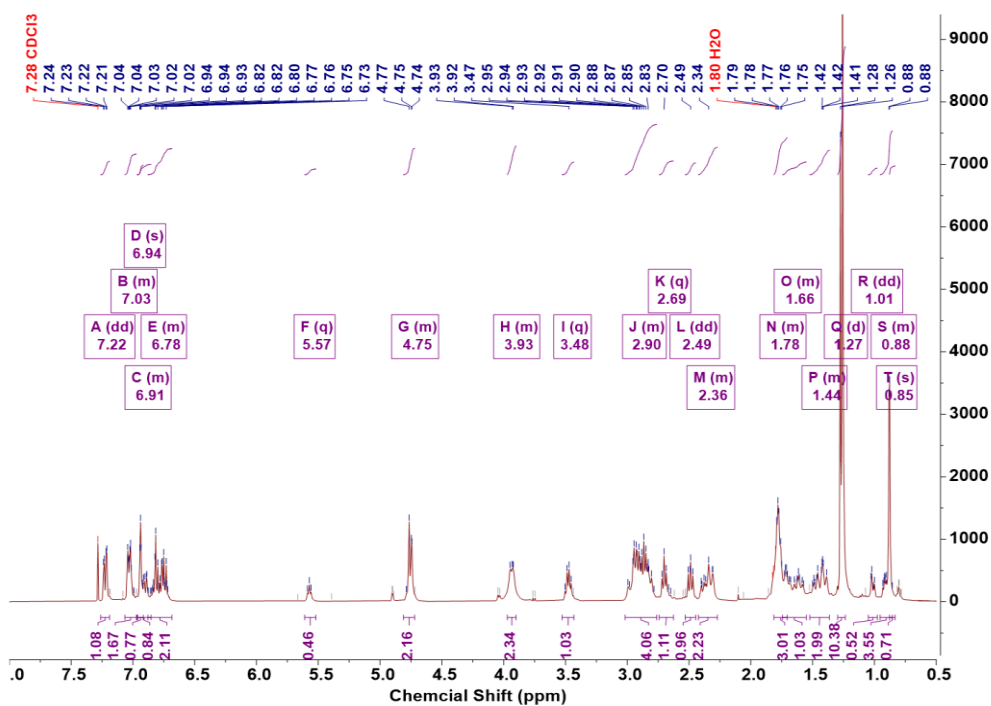

Figure S4. <sup>1</sup>H NMR spectrum of DcTa-da (CDCl<sub>3</sub>).

## S2. <sup>13</sup>C NMR Spectra of Monomers

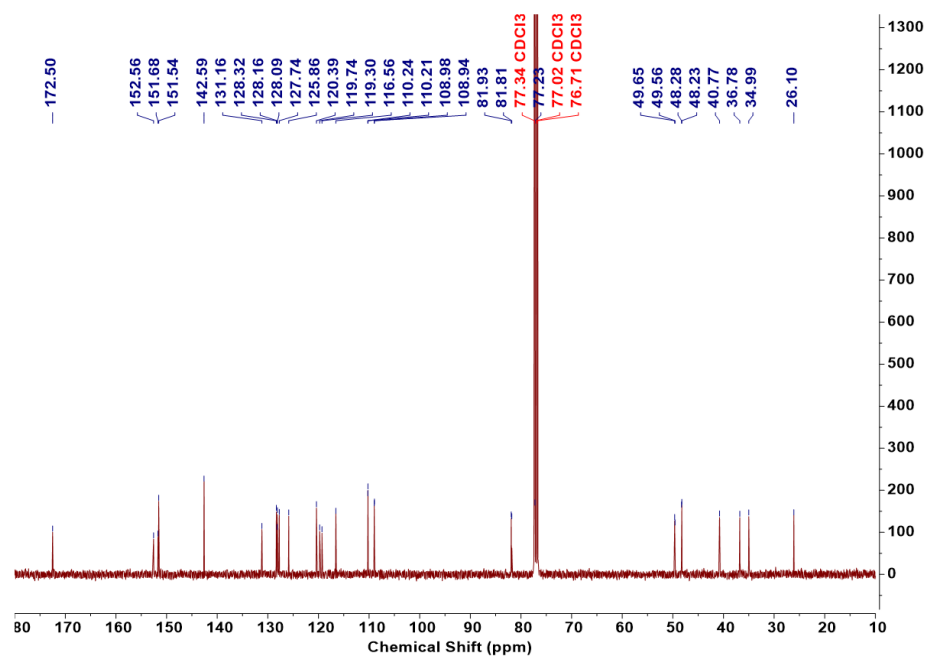

Figure S5. <sup>13</sup>C NMR spectrum of DcTa-fa (CDCl<sub>3</sub>).

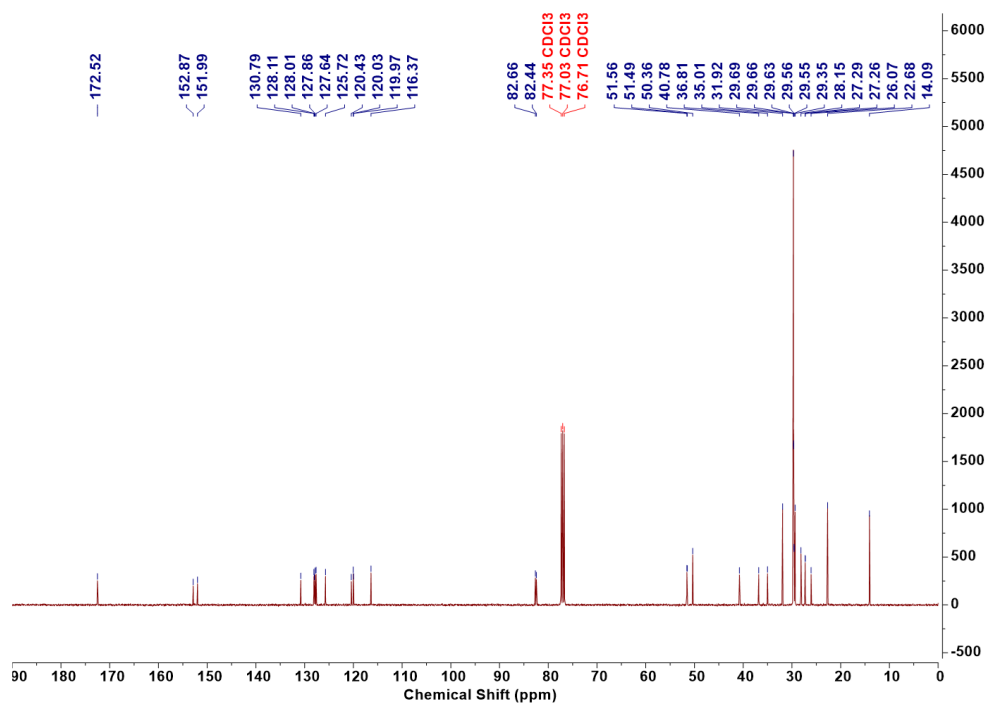

Figure S6. <sup>13</sup>C NMR spectrum of DcTa-sa (CDCl<sub>3</sub>).

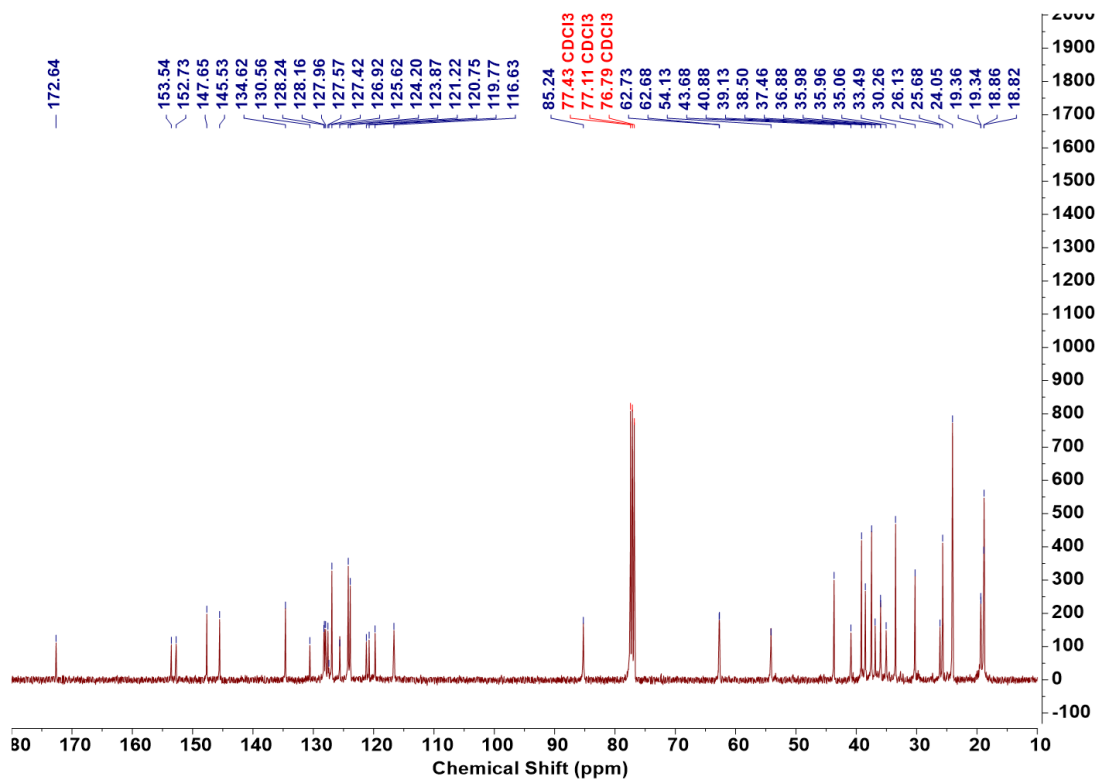

Figure S7.  $^{13}\text{C}$  NMR spectrum of DcTa-da ( $\text{CDCl}_3$ ).

### S3. FT-IR Spectra of Monomers

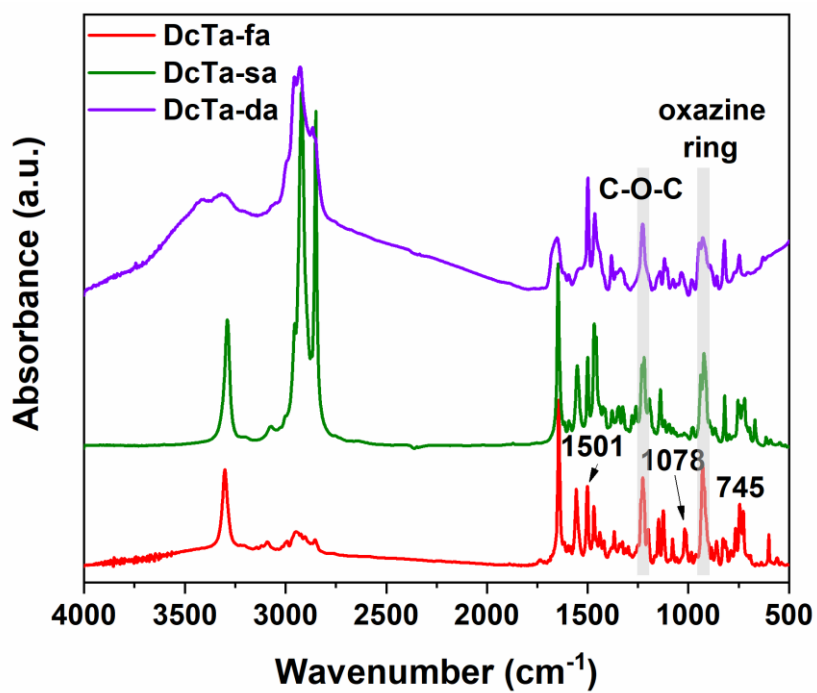

Figure S8. FT-IR spectra of DcTa-fa, DcTa-sa and DcTa-da .

#### S4. HR-MS Spectra of Monomers

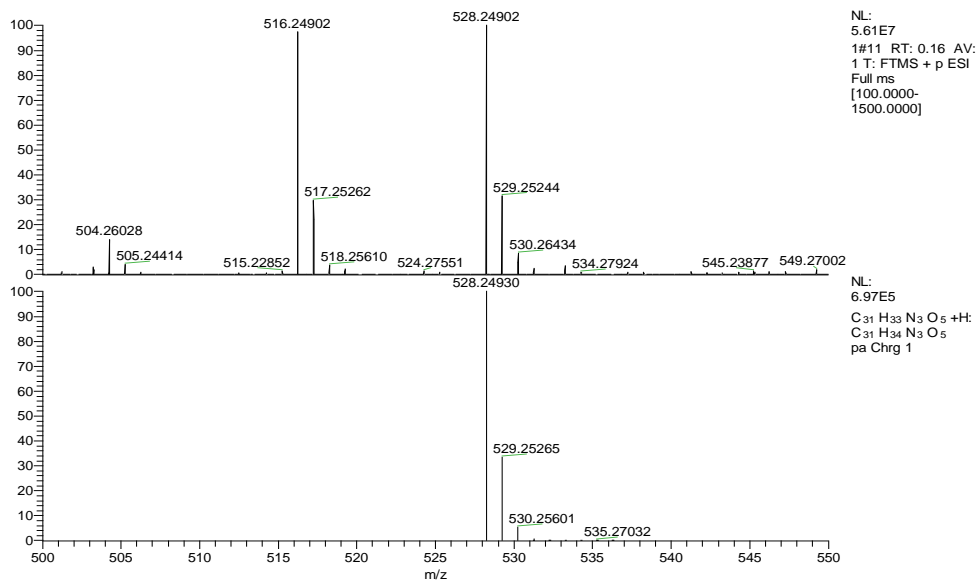

Figure S9. Experimental and theoretical HR-MS spectra of DcTa-fa.

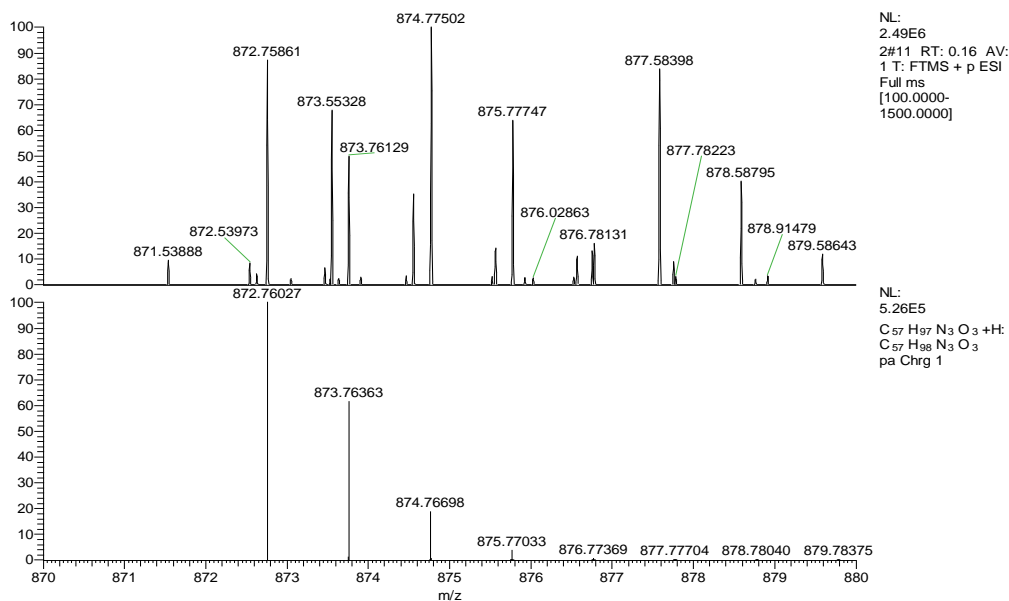

Figure S10. Experimental and theoretical HR-MS spectra of DcTa-sa.

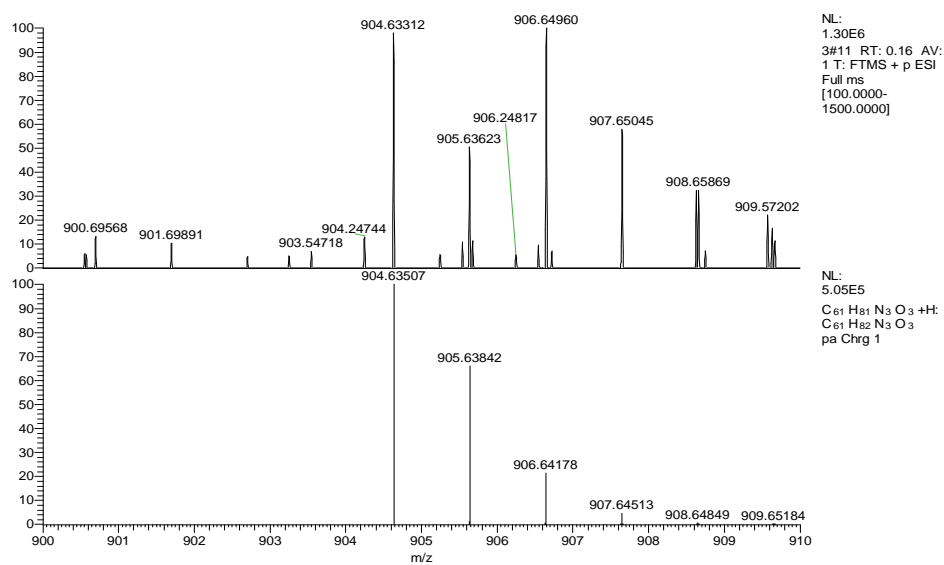

**Figure S11.** Experimental and theoretical HR-MS spectra of **DcTa-da**.



### S5. DSC Analysis at different temperature ramp rates

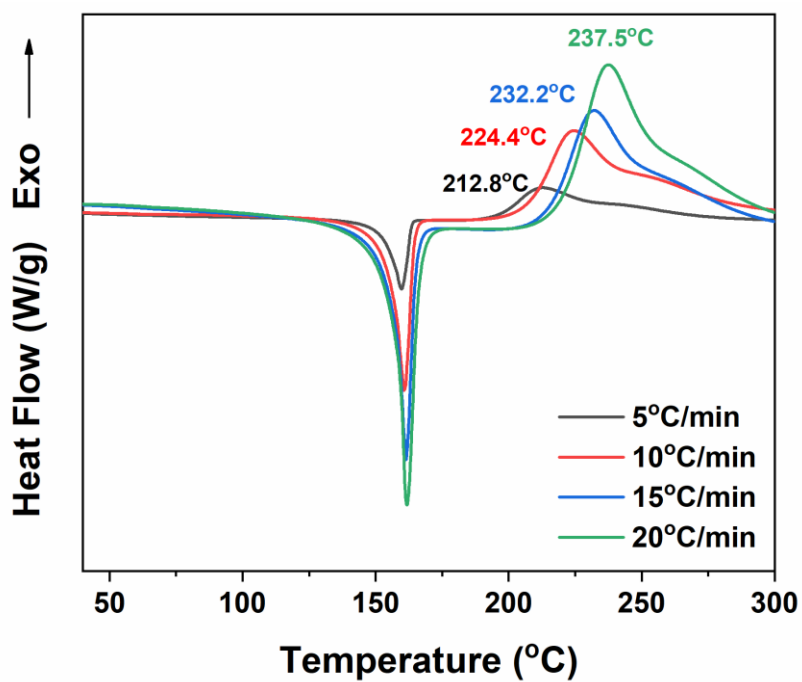

Figure S12. DSC thermograms of DcTa-fa at different heating rates

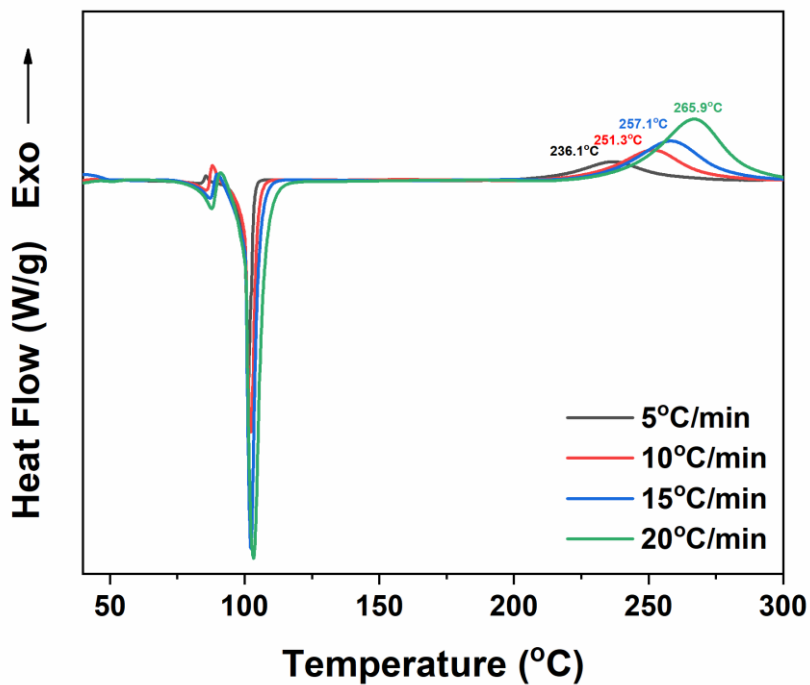

Figure S13. DSC thermograms of DcTa-sa at different heating rates

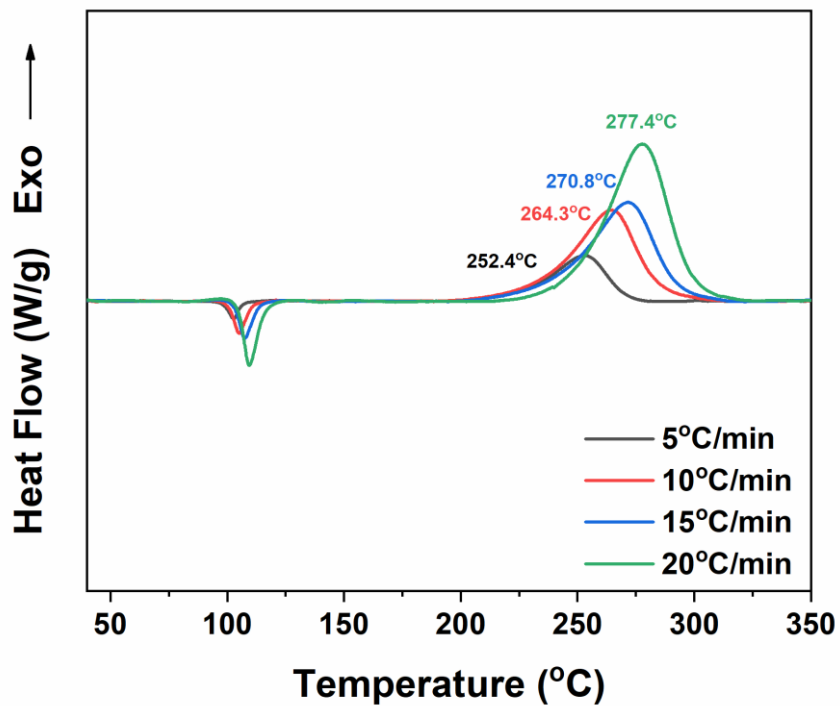

Figure S14. DSC thermograms of DcTa-da at different heating rates

S6. Structures of BA-a and poly(BA-a)

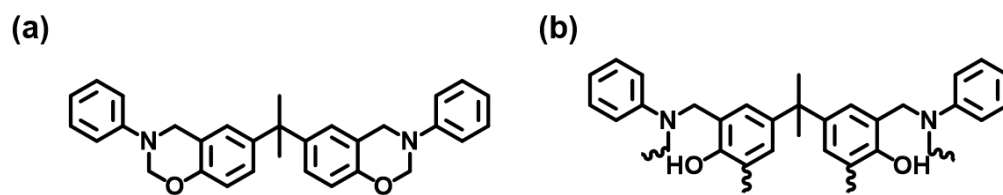

Figure S15. Structure of BA-a (a) and poly(BA-a) (b).

## S7. Detailed DFT optimized structure

### 1. DcTa-fa

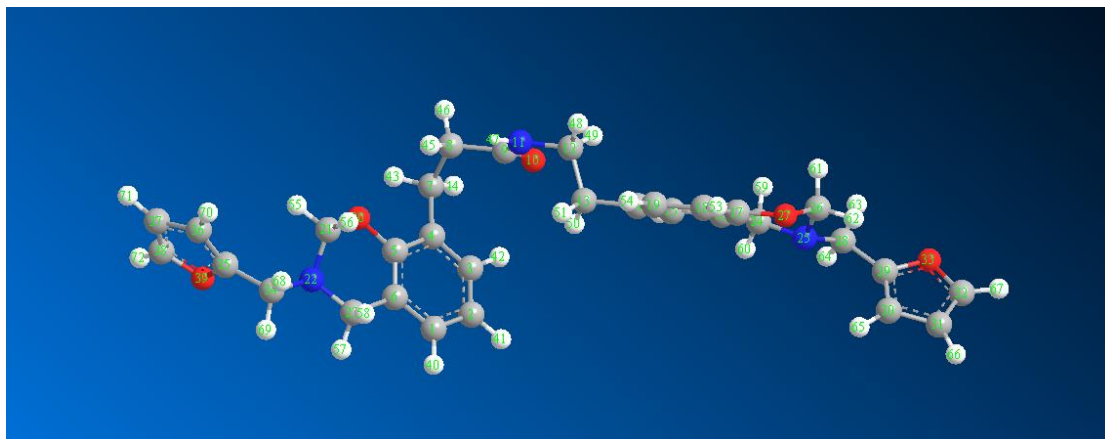

#### Atomic Coordinates of the Atoms.

| Tag | Symbol | NA | NB | NC | Bond     | Angle    | Dihedral | X        | Y        | Z        |
|-----|--------|----|----|----|----------|----------|----------|----------|----------|----------|
| 1   | C      |    |    |    |          |          |          | -3.23178 | -2.55126 | -0.558   |
| 2   | C      | 1  |    |    | 1.392029 |          |          | -2.19335 | -2.16085 | -1.39882 |
| 3   | C      | 2  | 1  |    | 1.39765  | 119.6607 |          | -2.22198 | -0.89551 | -1.99172 |
| 4   | C      | 3  | 2  | 1  | 1.397166 | 121.2713 | 0.836084 | -3.26725 | -0.00208 | -1.74419 |
| 5   | C      | 4  | 3  | 2  | 1.407158 | 117.8801 | 0.402206 | -4.29045 | -0.41244 | -0.86968 |
| 6   | C      | 1  | 2  | 3  | 1.398537 | 120.7606 | -0.74836 | -4.29648 | -1.68589 | -0.28692 |
| 7   | C      | 4  | 3  | 2  | 1.512979 | 121.6098 | 179.4822 | -3.3001  | 1.373754 | -2.37276 |
| 8   | C      | 7  | 4  | 3  | 1.541855 | 113.3427 | -97.5002 | -2.76988 | 2.483218 | -1.44256 |
| 9   | C      | 8  | 7  | 4  | 1.527489 | 111.6201 | 68.18475 | -1.26857 | 2.343081 | -1.1983  |
| 10  | O      | 9  | 8  | 7  | 1.228489 | 122.0488 | 43.06136 | -0.4826  | 2.078175 | -2.10453 |
| 11  | N      | 9  | 8  | 7  | 1.366994 | 115.6551 | -138.947 | -0.85346 | 2.573507 | 0.083601 |
| 12  | C      | 11 | 9  | 8  | 1.45617  | 121.7567 | 177.246  | 0.539906 | 2.419071 | 0.477435 |
| 13  | C      | 12 | 11 | 9  | 1.54476  | 113.3026 | -84.6905 | 0.914537 | 0.96529  | 0.841378 |
| 14  | C      | 13 | 12 | 11 | 1.51244  | 112.0851 | 176.7596 | 2.383879 | 0.821947 | 1.169951 |
| 15  | C      | 14 | 13 | 12 | 1.399165 | 120.5641 | -82.5168 | 3.330642 | 0.680701 | 0.149485 |

|    |   |    |    |    |          |          |          |          |          |          |
|----|---|----|----|----|----------|----------|----------|----------|----------|----------|
| 16 | C | 15 | 14 | 13 | 1.397085 | 122.11   | 178.0734 | 4.699137 | 0.585593 | 0.414101 |
| 17 | C | 16 | 15 | 14 | 1.401637 | 118.5455 | -0.48314 | 5.129309 | 0.644464 | 1.746795 |
| 18 | C | 17 | 16 | 15 | 1.397482 | 120.4936 | 1.09436  | 4.203518 | 0.772199 | 2.785809 |
| 19 | C | 18 | 17 | 16 | 1.391235 | 119.7379 | -0.8829  | 2.846122 | 0.859953 | 2.493731 |
| 20 | O | 5  | 4  | 3  | 1.375723 | 116.8449 | 178.9761 | -5.29766 | 0.491913 | -0.62415 |
| 21 | C | 20 | 5  | 4  | 1.419979 | 114.9057 | -166.525 | -6.13716 | 0.168345 | 0.474432 |
| 22 | N | 21 | 20 | 5  | 1.446437 | 111.3362 | -48.6533 | -6.58666 | -1.20481 | 0.406737 |
| 23 | C | 22 | 21 | 20 | 1.461977 | 109.8025 | 67.08836 | -5.45215 | -2.10725 | 0.596092 |
| 24 | C | 16 | 15 | 14 | 1.513902 | 121.6352 | 178.4896 | 5.711481 | 0.399221 | -0.696   |
| 25 | N | 24 | 16 | 15 | 1.464051 | 109.9826 | -163.381 | 6.985912 | -0.05832 | -0.13929 |
| 26 | C | 25 | 24 | 16 | 1.450566 | 109.7936 | -47.8386 | 7.348718 | 0.764948 | 0.998579 |
| 27 | O | 17 | 16 | 15 | 1.370437 | 121.8895 | -179.789 | 6.455097 | 0.562381 | 2.08391  |
| 28 | C | 25 | 24 | 16 | 1.460392 | 112.4148 | -174.417 | 8.03997  | -0.13092 | -1.14747 |
| 29 | C | 28 | 25 | 24 | 1.498039 | 111.8424 | -162.608 | 9.191174 | -0.97358 | -0.69056 |
| 30 | C | 29 | 28 | 25 | 1.363612 | 133.7716 | 30.29789 | 9.300948 | -2.05211 | 0.136584 |
| 31 | C | 30 | 29 | 28 | 1.435134 | 106.4183 | 177.5421 | 10.68303 | -2.43828 | 0.118346 |
| 32 | C | 31 | 30 | 29 | 1.359969 | 106.1926 | -0.16656 | 11.30857 | -1.56932 | -0.72017 |
| 33 | O | 32 | 31 | 30 | 1.366253 | 110.3695 | 0.285351 | 10.41514 | -0.66503 | -1.22085 |
| 34 | C | 22 | 21 | 20 | 1.465395 | 113.1603 | -166.843 | -7.68454 | -1.49814 | 1.331945 |
| 35 | C | 34 | 22 | 21 | 1.49274  | 113.6698 | 67.03966 | -8.95768 | -0.79643 | 0.992849 |
| 36 | C | 35 | 34 | 22 | 1.365523 | 133.1965 | -114.88  | -9.69309 | 0.163912 | 1.626552 |
| 37 | C | 36 | 35 | 34 | 1.433982 | 106.7043 | -178.494 | -10.8458 | 0.406829 | 0.808888 |
| 38 | C | 37 | 36 | 35 | 1.360691 | 105.8497 | -0.00747 | -10.7242 | -0.42467 | -0.2613  |
| 39 | O | 38 | 37 | 36 | 1.362327 | 110.6211 | 0.094077 | -9.58457 | -1.16509 | -0.16657 |
| 40 | H | 1  | 2  | 3  | 1.088307 | 120.1592 | 178.5394 | -3.22968 | -3.54348 | -0.1109  |
| 41 | H | 2  | 1  | 6  | 1.086235 | 120.1959 | -179.845 | -1.37216 | -2.8413  | -1.60507 |

|    |   |    |    |    |          |          |          |          |          |          |
|----|---|----|----|----|----------|----------|----------|----------|----------|----------|
| 42 | H | 3  | 2  | 1  | 1.086375 | 120.2969 | -179.843 | -1.41829 | -0.58118 | -2.65164 |
| 43 | H | 7  | 4  | 3  | 1.09461  | 109.7976 | 141.1058 | -4.32567 | 1.625227 | -2.66111 |
| 44 | H | 7  | 4  | 3  | 1.093858 | 109.3584 | 22.81708 | -2.68559 | 1.373724 | -3.27769 |
| 45 | H | 8  | 7  | 4  | 1.096075 | 110.2305 | -56.567  | -3.33433 | 2.492002 | -0.50305 |
| 46 | H | 8  | 7  | 4  | 1.098453 | 108.9933 | -173.79  | -2.92831 | 3.458366 | -1.92275 |
| 47 | H | 11 | 9  | 8  | 1.010031 | 118.3362 | 10.59544 | -1.55372 | 2.655671 | 0.806821 |
| 48 | H | 12 | 11 | 9  | 1.095734 | 108.5997 | 152.3643 | 0.740144 | 3.086606 | 1.322973 |
| 49 | H | 12 | 11 | 9  | 1.092528 | 107.0896 | 36.07807 | 1.150492 | 2.751868 | -0.36521 |
| 50 | H | 13 | 12 | 11 | 1.095637 | 107.7106 | 54.94707 | 0.646998 | 0.329149 | -0.0096  |
| 51 | H | 13 | 12 | 11 | 1.097651 | 109.1706 | -60.8941 | 0.302803 | 0.637538 | 1.691788 |
| 52 | H | 15 | 14 | 13 | 1.089355 | 119.055  | -2.712   | 2.990763 | 0.630515 | -0.88427 |
| 53 | H | 18 | 17 | 16 | 1.085675 | 118.7226 | 179.1437 | 4.567421 | 0.80088  | 3.808278 |
| 54 | H | 19 | 18 | 17 | 1.087983 | 119.2532 | 179.8254 | 2.132031 | 0.956327 | 3.308895 |
| 55 | H | 21 | 20 | 5  | 1.091003 | 106.2286 | -168.104 | -6.99422 | 0.840493 | 0.411569 |
| 56 | H | 21 | 20 | 5  | 1.111195 | 108.3277 | 74.87384 | -5.58048 | 0.37757  | 1.413093 |
| 57 | H | 23 | 22 | 21 | 1.097103 | 108.3804 | -168.286 | -5.77116 | -3.12371 | 0.334048 |
| 58 | H | 23 | 22 | 21 | 1.111001 | 111.5312 | 74.64062 | -5.12966 | -2.13941 | 1.658774 |
| 59 | H | 24 | 16 | 15 | 1.109729 | 110.0601 | 73.31821 | 5.830915 | 1.344523 | -1.26489 |
| 60 | H | 24 | 16 | 15 | 1.096882 | 110.0185 | -43.9752 | 5.353262 | -0.3541  | -1.40827 |
| 61 | H | 26 | 25 | 24 | 1.109291 | 111.8404 | -53.8574 | 7.352127 | 1.844306 | 0.742648 |
| 62 | H | 26 | 25 | 24 | 1.090485 | 109.6303 | -175.297 | 8.336481 | 0.47639  | 1.359435 |
| 63 | H | 28 | 25 | 24 | 1.107492 | 113.055  | 73.96793 | 8.420386 | 0.864323 | -1.44966 |
| 64 | H | 28 | 25 | 24 | 1.098812 | 106.932  | -42.1525 | 7.590075 | -0.56737 | -2.04996 |
| 65 | H | 30 | 29 | 28 | 1.080463 | 125.7021 | -2.60381 | 8.49204  | -2.50781 | 0.689221 |
| 66 | H | 31 | 30 | 29 | 1.081277 | 127.2609 | 179.6776 | 11.14238 | -3.25284 | 0.661174 |
| 67 | H | 32 | 31 | 30 | 1.079296 | 133.9903 | 179.915  | 12.32856 | -1.4513  | -1.05272 |

|    |   |    |    |    |          |          |          |          |          |          |
|----|---|----|----|----|----------|----------|----------|----------|----------|----------|
| 68 | H | 34 | 22 | 21 | 1.107611 | 112.3696 | -55.918  | -7.42861 | -1.2524  | 2.381191 |
| 69 | H | 34 | 22 | 21 | 1.097176 | 106.6438 | -172.317 | -7.84517 | -2.58287 | 1.295163 |
| 70 | H | 36 | 35 | 34 | 1.081742 | 126.0602 | 1.194898 | -9.44581 | 0.638251 | 2.566777 |
| 71 | H | 37 | 36 | 35 | 1.081032 | 127.4639 | -179.963 | -11.6496 | 1.105028 | 0.996245 |
| 72 | H | 38 | 37 | 36 | 1.079461 | 133.7319 | -179.729 | -11.3272 | -0.60538 | -1.13819 |

**Total Energy: -1741.487245 au**

## 2. DcTa-sa

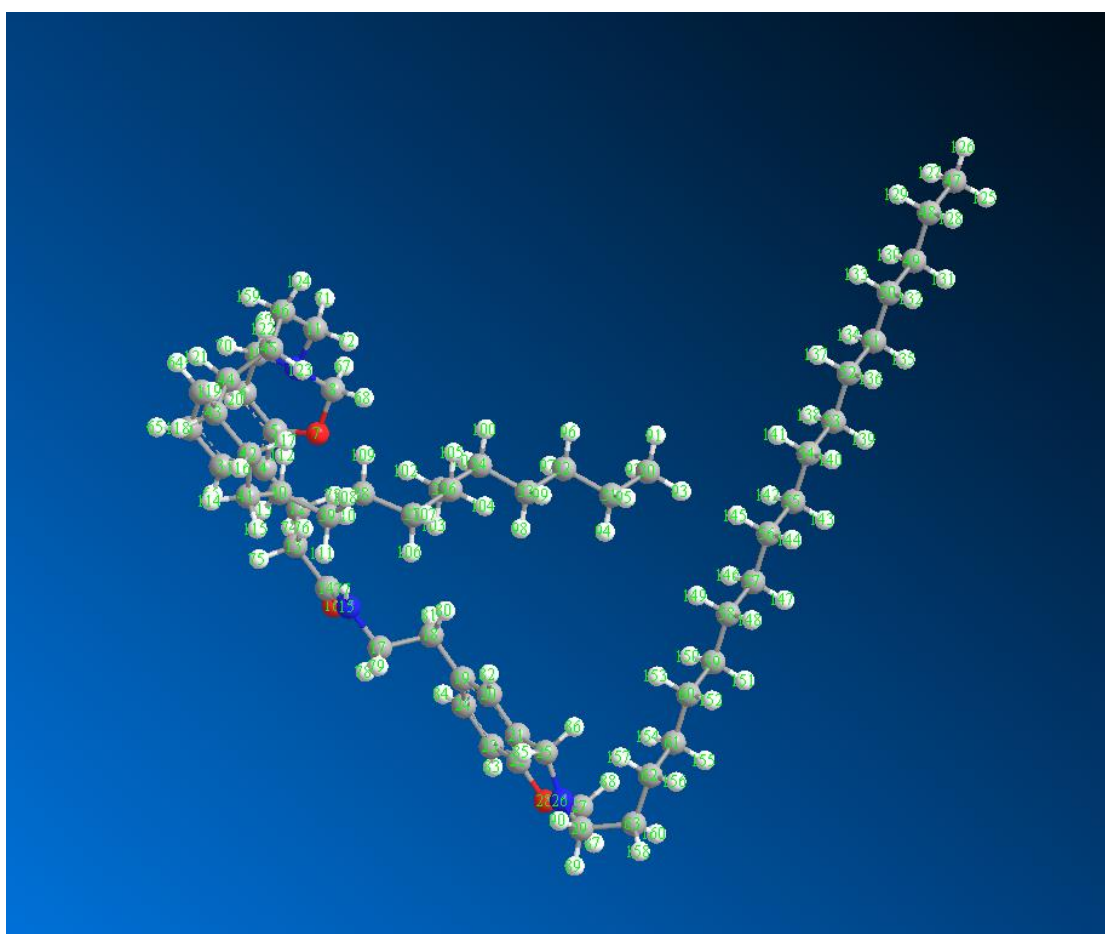

### Atomic Coordinates of the Atoms.

| Tag | Symbol | NA | NB | NC | Bond     | Angle | Dihedral | X        | Y        | Z        |
|-----|--------|----|----|----|----------|-------|----------|----------|----------|----------|
| 1   | C      |    |    |    |          |       |          | -8.46662 | 3.690855 | -2.49133 |
| 2   | C      | 1  |    |    | 1.391721 |       |          | -8.78981 | 2.669934 | -3.38024 |

|    |   |    |    |    |          |          |          |          |          |          |
|----|---|----|----|----|----------|----------|----------|----------|----------|----------|
| 3  | C | 2  | 1  |    | 1.397482 | 119.6271 |          | -7.90255 | 1.60568  | -3.56215 |
| 4  | C | 3  | 2  | 1  | 1.396504 | 121.4753 | -0.32616 | -6.68834 | 1.543055 | -2.87512 |
| 5  | C | 4  | 3  | 2  | 1.407457 | 117.6097 | -0.01608 | -6.38563 | 2.593389 | -1.9885  |
| 6  | C | 1  | 2  | 3  | 1.399008 | 120.7235 | 0.254216 | -7.26102 | 3.665948 | -1.78201 |
| 7  | O | 5  | 4  | 3  | 1.377091 | 117.147  | -179.961 | -5.18561 | 2.522428 | -1.31671 |
| 8  | C | 7  | 5  | 4  | 1.419936 | 114.118  | 161.6814 | -4.75087 | 3.76009  | -0.77319 |
| 9  | N | 8  | 7  | 5  | 1.449779 | 111.3917 | 52.84605 | -5.7801  | 4.368053 | 0.047122 |
| 10 | C | 9  | 8  | 7  | 1.465502 | 109.1739 | -67.3378 | -6.90187 | 4.768686 | -0.80659 |
| 11 | C | 9  | 8  | 7  | 1.464656 | 111.6299 | 166.907  | -5.24833 | 5.470628 | 0.851336 |
| 12 | C | 4  | 3  | 2  | 1.511208 | 121.6807 | 179.5134 | -5.73035 | 0.389032 | -3.06014 |
| 13 | C | 12 | 4  | 3  | 1.54031  | 112.6149 | -100.631 | -5.81545 | -0.64043 | -1.91755 |
| 14 | C | 13 | 12 | 4  | 1.526991 | 111.8849 | 176.451  | -4.90475 | -1.84106 | -2.16418 |
| 15 | N | 14 | 13 | 12 | 1.367599 | 115.2837 | 143.9748 | -4.31379 | -2.36503 | -1.04769 |
| 16 | O | 14 | 13 | 12 | 1.227699 | 122.4073 | -37.9058 | -4.74206 | -2.32514 | -3.28062 |
| 17 | C | 15 | 14 | 13 | 1.456357 | 121.9002 | 179.0935 | -3.43338 | -3.52321 | -1.11454 |
| 18 | C | 17 | 15 | 14 | 1.544439 | 113.4201 | 84.37841 | -1.97291 | -3.16462 | -1.46631 |
| 19 | C | 18 | 17 | 15 | 1.512504 | 112.2162 | -178.223 | -1.09243 | -4.38999 | -1.57072 |
| 20 | C | 19 | 18 | 17 | 1.397391 | 121.3637 | -94.9948 | -0.33013 | -4.83236 | -0.48633 |
| 21 | C | 20 | 19 | 18 | 1.398733 | 122.3402 | 177.749  | 0.455096 | -5.98837 | -0.54569 |
| 22 | C | 21 | 20 | 19 | 1.402677 | 118.4118 | 0.749024 | 0.484222 | -6.71451 | -1.74543 |
| 23 | C | 22 | 21 | 20 | 1.39973  | 120.3082 | -1.1895  | -0.27819 | -6.29695 | -2.84253 |
| 24 | C | 23 | 22 | 21 | 1.389484 | 120.0132 | 0.704001 | -1.05743 | -5.15016 | -2.75128 |
| 25 | C | 21 | 20 | 19 | 1.517746 | 121.3654 | -178.393 | 1.246393 | -6.46849 | 0.65717  |
| 26 | N | 25 | 21 | 20 | 1.453347 | 109.2424 | 167.0243 | 1.70907  | -7.82491 | 0.415743 |
| 27 | C | 26 | 25 | 21 | 1.431017 | 113.055  | 44.61314 | 2.249998 | -8.00729 | -0.89649 |
| 28 | O | 22 | 21 | 20 | 1.369604 | 122.3786 | 178.871  | 1.242318 | -7.84457 | -1.90056 |



|    |   |    |    |    |          |          |          |          |          |          |
|----|---|----|----|----|----------|----------|----------|----------|----------|----------|
| 29 | C | 26 | 25 | 21 | 1.454357 | 120.1603 | -167.375 | 2.252306 | -8.61691 | 1.507885 |
| 30 | C | 18 | 17 | 15 | 7.67521  | 155.1357 | 23.32212 | 4.14077  | 1.449907 | -1.95401 |
| 31 | C | 30 | 18 | 17 | 1.532113 | 33.30311 | 59.9962  | 3.10946  | 0.783267 | -1.03785 |
| 32 | C | 31 | 30 | 18 | 1.534071 | 113.2198 | -81.626  | 1.771811 | 1.532585 | -0.98693 |
| 33 | C | 32 | 31 | 30 | 1.534383 | 113.6195 | 179.6996 | 0.729482 | 0.868672 | -0.07748 |
| 34 | C | 33 | 32 | 31 | 1.535507 | 113.1534 | -179.789 | -0.60659 | 1.624428 | -0.03843 |
| 35 | C | 34 | 33 | 32 | 1.539249 | 114.9907 | 176.7111 | -1.70956 | 0.952474 | 0.798957 |
| 36 | C | 35 | 34 | 33 | 1.535828 | 114.4111 | 68.37317 | -1.44173 | 0.943443 | 2.311224 |
| 37 | C | 36 | 35 | 34 | 1.540582 | 115.9972 | -177.421 | -2.49279 | 0.225231 | 3.178885 |
| 38 | C | 37 | 36 | 35 | 1.546515 | 115.9867 | -62.9766 | -3.9157  | 0.830755 | 3.159599 |
| 39 | C | 38 | 37 | 36 | 1.537693 | 114.5331 | 94.02331 | -4.86693 | 0.193477 | 2.133175 |
| 40 | C | 39 | 38 | 37 | 1.53969  | 115.8931 | -174.898 | -6.25257 | 0.851697 | 2.001349 |
| 41 | C | 40 | 39 | 38 | 1.547379 | 115.276  | -65.0063 | -7.15121 | 0.756999 | 3.257479 |
| 42 | C | 41 | 40 | 39 | 1.546191 | 117.6154 | 93.60078 | -7.11265 | 1.936178 | 4.256857 |
| 43 | C | 42 | 41 | 40 | 1.543464 | 115.4539 | 86.96605 | -8.08127 | 3.097957 | 3.949754 |
| 44 | C | 43 | 42 | 41 | 1.539889 | 117.5515 | -74.4082 | -7.71848 | 4.039145 | 2.786223 |
| 45 | C | 44 | 43 | 42 | 1.536812 | 113.6125 | -69.5214 | -6.4989  | 4.929503 | 3.072029 |
| 46 | C | 11 | 9  | 8  | 1.535442 | 115.2191 | -166.596 | -6.1695  | 5.963146 | 1.976698 |
| 47 | C | 30 | 18 | 17 | 11.92471 | 171.6159 | 16.23146 | 12.79405 | 9.64644  | -1.58487 |
| 48 | C | 47 | 30 | 18 | 1.532134 | 44.07397 | 58.87631 | 12.0879  | 8.744684 | -0.56721 |
| 49 | C | 48 | 47 | 30 | 1.534148 | 113.2661 | 32.88103 | 11.65951 | 7.392045 | -1.1507  |
| 50 | C | 49 | 48 | 47 | 1.534045 | 113.6234 | 179.9918 | 10.95166 | 6.482343 | -0.13844 |
| 51 | C | 50 | 49 | 48 | 1.534207 | 113.5978 | 179.9747 | 10.52298 | 5.130075 | -0.72272 |
| 52 | C | 51 | 50 | 49 | 1.534221 | 113.5959 | 179.9746 | 9.815598 | 4.220058 | 0.289856 |
| 53 | C | 52 | 51 | 50 | 1.534217 | 113.5761 | 179.9411 | 9.385838 | 2.868489 | -0.29529 |
| 54 | C | 53 | 52 | 51 | 1.534224 | 113.5946 | 179.959  | 8.679294 | 1.957725 | 0.717211 |

|    |   |    |    |    |          |          |          |          |          |          |
|----|---|----|----|----|----------|----------|----------|----------|----------|----------|
| 55 | C | 54 | 53 | 52 | 1.534188 | 113.5727 | 179.9169 | 8.247968 | 0.60714  | 0.131029 |
| 56 | C | 55 | 54 | 53 | 1.534166 | 113.6    | 179.9745 | 7.541926 | -0.30435 | 1.143135 |
| 57 | C | 56 | 55 | 54 | 1.534218 | 113.5856 | -179.842 | 7.114159 | -1.65639 | 0.557613 |
| 58 | C | 57 | 56 | 55 | 1.534178 | 113.5702 | 179.8887 | 6.410563 | -2.56866 | 1.570729 |
| 59 | C | 58 | 57 | 56 | 1.534222 | 113.5785 | -179.746 | 5.988211 | -3.92319 | 0.987033 |
| 60 | C | 59 | 58 | 57 | 1.534234 | 113.5316 | 179.813  | 5.288771 | -4.8364  | 2.002272 |
| 61 | C | 60 | 59 | 58 | 1.533885 | 113.5992 | -179.86  | 4.868857 | -6.19244 | 1.421206 |
| 62 | C | 61 | 60 | 59 | 1.535903 | 113.3717 | 178.0525 | 4.211954 | -7.12062 | 2.453656 |
| 63 | C | 62 | 61 | 60 | 1.545217 | 114.7772 | 178.5709 | 3.744561 | -8.48324 | 1.894634 |
| 64 | H | 1  | 2  | 3  | 1.088241 | 120.1478 | -179.412 | -9.1556  | 4.518769 | -2.336   |
| 65 | H | 2  | 1  | 6  | 1.086228 | 120.2149 | -179.899 | -9.72742 | 2.698437 | -3.92793 |
| 66 | H | 3  | 2  | 1  | 1.087591 | 119.8541 | -179.788 | -8.14982 | 0.807636 | -4.25845 |
| 67 | H | 8  | 7  | 5  | 1.109065 | 108.2532 | -71.0769 | -4.43811 | 4.416523 | -1.61063 |
| 68 | H | 8  | 7  | 5  | 1.091997 | 106.0435 | 172.0736 | -3.87908 | 3.529631 | -0.15729 |
| 69 | H | 10 | 9  | 8  | 1.110328 | 110.8424 | -76.9054 | -6.66321 | 5.700631 | -1.36099 |
| 70 | H | 10 | 9  | 8  | 1.09497  | 108.9634 | 166.0704 | -7.76746 | 4.993197 | -0.17468 |
| 71 | H | 11 | 9  | 8  | 1.109134 | 110.8427 | 69.60572 | -4.98171 | 6.334707 | 0.209106 |
| 72 | H | 11 | 9  | 8  | 1.097896 | 107.1304 | -46.3283 | -4.31356 | 5.117564 | 1.306239 |
| 73 | H | 12 | 4  | 3  | 1.095774 | 109.7873 | 138.0803 | -4.70294 | 0.765511 | -3.11851 |
| 74 | H | 12 | 4  | 3  | 1.093691 | 110.2013 | 20.37392 | -5.93752 | -0.12648 | -4.00221 |
| 75 | H | 13 | 12 | 4  | 1.098709 | 109.209  | 57.62714 | -6.84511 | -1.0171  | -1.84629 |
| 76 | H | 13 | 12 | 4  | 1.095143 | 110.0439 | -59.3322 | -5.58715 | -0.15898 | -0.96077 |
| 77 | H | 15 | 14 | 13 | 1.010353 | 118.8389 | -7.48689 | -4.41311 | -1.87649 | -0.1689  |
| 78 | H | 17 | 15 | 14 | 1.093119 | 107.4679 | -36.5221 | -3.83364 | -4.19603 | -1.87744 |
| 79 | H | 17 | 15 | 14 | 1.09557  | 108.4141 | -152.885 | -3.47351 | -4.04446 | -0.15175 |
| 80 | H | 18 | 17 | 15 | 1.098044 | 109.0251 | 59.39962 | -1.57936 | -2.4786  | -0.7046  |

|     |   |    |    |    |          |          |          |          |          |          |
|-----|---|----|----|----|----------|----------|----------|----------|----------|----------|
| 81  | H | 18 | 17 | 15 | 1.095673 | 107.5767 | -56.5422 | -1.98567 | -2.62034 | -2.41715 |
| 82  | H | 20 | 19 | 18 | 1.09001  | 119.1691 | -1.87645 | -0.34879 | -4.26367 | 0.443382 |
| 83  | H | 23 | 22 | 21 | 1.085727 | 118.5396 | -179.881 | -0.23562 | -6.88157 | -3.75643 |
| 84  | H | 24 | 23 | 22 | 1.087686 | 119.4967 | 179.6868 | -1.6426  | -4.83052 | -3.61062 |
| 85  | H | 25 | 21 | 20 | 1.097872 | 109.6081 | 48.60931 | 0.598843 | -6.47942 | 1.54367  |
| 86  | H | 25 | 21 | 20 | 1.107289 | 109.5848 | -67.8414 | 2.062613 | -5.75246 | 0.874357 |
| 87  | H | 27 | 26 | 25 | 1.092642 | 109.875  | 177.415  | 2.622467 | -9.02862 | -1.00609 |
| 88  | H | 27 | 26 | 25 | 1.106928 | 113.5129 | 55.17592 | 3.065476 | -7.29958 | -1.14028 |
| 89  | H | 29 | 26 | 25 | 1.100019 | 107.1051 | 152.7347 | 2.073605 | -9.6739  | 1.261112 |
| 90  | H | 29 | 26 | 25 | 1.098147 | 106.756  | 39.25326 | 1.638543 | -8.39977 | 2.392233 |
| 91  | H | 30 | 18 | 17 | 1.097112 | 134.5743 | 5.099988 | 4.361605 | 2.472841 | -1.62463 |
| 92  | H | 30 | 18 | 17 | 1.09698  | 79.97681 | -99.6553 | 3.775283 | 1.507426 | -2.98672 |
| 93  | H | 30 | 18 | 17 | 1.096367 | 112.4197 | 155.2809 | 5.085075 | 0.892992 | -1.9664  |
| 94  | H | 31 | 30 | 18 | 1.099225 | 109.447  | 40.44006 | 2.933345 | -0.24818 | -1.3746  |
| 95  | H | 31 | 30 | 18 | 1.099581 | 109.4461 | 156.2599 | 3.519776 | 0.705045 | -0.0207  |
| 96  | H | 32 | 31 | 30 | 1.100532 | 109.201  | -57.9831 | 1.947603 | 2.564278 | -0.64652 |
| 97  | H | 32 | 31 | 30 | 1.100231 | 109.1902 | 57.46245 | 1.364575 | 1.61524  | -2.00567 |
| 98  | H | 33 | 32 | 31 | 1.100473 | 109.183  | -58.1258 | 0.550394 | -0.16039 | -0.42389 |
| 99  | H | 33 | 32 | 31 | 1.098836 | 108.9412 | 57.35704 | 1.144437 | 0.781517 | 0.936255 |
| 100 | H | 34 | 33 | 32 | 1.100801 | 109.2542 | -60.0938 | -0.43582 | 2.644348 | 0.338883 |
| 101 | H | 34 | 33 | 32 | 1.099108 | 108.4943 | 55.02811 | -0.97208 | 1.73989  | -1.06854 |
| 102 | H | 35 | 34 | 33 | 1.097862 | 108.2707 | -169.356 | -2.65683 | 1.470375 | 0.599517 |
| 103 | H | 35 | 34 | 33 | 1.100915 | 109.0112 | -54.6398 | -1.85063 | -0.08001 | 0.443855 |
| 104 | H | 36 | 35 | 34 | 1.098112 | 109.2472 | -55.3055 | -0.46815 | 0.473356 | 2.503616 |
| 105 | H | 36 | 35 | 34 | 1.100854 | 108.712  | 59.76082 | -1.34743 | 1.983519 | 2.659402 |
| 106 | H | 37 | 36 | 35 | 1.100572 | 109.3457 | 61.10733 | -2.54483 | -0.8344  | 2.886074 |

|     |   |    |    |    |          |          |          |          |          |          |
|-----|---|----|----|----|----------|----------|----------|----------|----------|----------|
| 107 | H | 37 | 36 | 35 | 1.097917 | 107.2633 | 175.1281 | -2.11967 | 0.227725 | 4.211452 |
| 108 | H | 38 | 37 | 36 | 1.097109 | 108.8675 | -144.33  | -4.35941 | 0.72601  | 4.157499 |
| 109 | H | 38 | 37 | 36 | 1.100488 | 109.3659 | -29.1885 | -3.84909 | 1.913383 | 2.973714 |
| 110 | H | 39 | 38 | 37 | 1.098262 | 108.9402 | -52.9177 | -4.38802 | 0.210127 | 1.144972 |
| 111 | H | 39 | 38 | 37 | 1.102066 | 108.3078 | 62.35689 | -4.99872 | -0.86862 | 2.39612  |
| 112 | H | 40 | 39 | 38 | 1.096268 | 109.0172 | 60.69287 | -6.1245  | 1.893707 | 1.685731 |
| 113 | H | 40 | 39 | 38 | 1.098031 | 107.2417 | 174.226  | -6.7695  | 0.357887 | 1.167916 |
| 114 | H | 41 | 40 | 39 | 1.098918 | 108.9615 | -143.602 | -8.19484 | 0.622661 | 2.940602 |
| 115 | H | 41 | 40 | 39 | 1.099685 | 108.0441 | -29.825  | -6.89156 | -0.16764 | 3.793134 |
| 116 | H | 42 | 41 | 40 | 1.098554 | 107.8441 | -153.624 | -7.38518 | 1.547018 | 5.247363 |
| 117 | H | 42 | 41 | 40 | 1.09712  | 110.3633 | -38.8036 | -6.08821 | 2.314696 | 4.361356 |
| 118 | H | 43 | 42 | 41 | 1.099495 | 108.0088 | 49.04309 | -9.07646 | 2.670079 | 3.761559 |
| 119 | H | 43 | 42 | 41 | 1.100262 | 108.2501 | 163.083  | -8.1862  | 3.708587 | 4.858983 |
| 120 | H | 44 | 43 | 42 | 1.094633 | 110.8035 | 54.84377 | -7.55932 | 3.472734 | 1.863147 |
| 121 | H | 44 | 43 | 42 | 1.100369 | 107.8763 | 170.7457 | -8.58251 | 4.69455  | 2.599944 |
| 122 | H | 45 | 44 | 43 | 1.099469 | 107.9072 | -54.2049 | -6.68638 | 5.468063 | 4.01205  |
| 123 | H | 45 | 44 | 43 | 1.098892 | 110.1857 | 60.90605 | -5.61057 | 4.308776 | 3.254052 |
| 124 | H | 46 | 11 | 9  | 1.098283 | 105.6867 | -176.763 | -5.65048 | 6.816652 | 2.43317  |
| 125 | H | 47 | 30 | 18 | 1.097077 | 106.8935 | 162.1268 | 13.7019  | 9.169361 | -1.97447 |
| 126 | H | 47 | 30 | 18 | 1.09609  | 143.7625 | 0.141274 | 13.08679 | 10.60345 | -1.13782 |
| 127 | H | 47 | 30 | 18 | 1.097082 | 71.42807 | -94.6333 | 12.14299 | 9.863973 | -2.44067 |
| 128 | H | 48 | 47 | 30 | 1.099413 | 109.4496 | 155.0017 | 12.75111 | 8.573959 | 0.292859 |
| 129 | H | 48 | 47 | 30 | 1.099417 | 109.4472 | -89.2367 | 11.20384 | 9.263545 | -0.1698  |
| 130 | H | 49 | 48 | 47 | 1.10039  | 109.1974 | -57.7099 | 10.99627 | 7.563208 | -2.01191 |
| 131 | H | 49 | 48 | 47 | 1.100385 | 109.1951 | 57.69697 | 12.54439 | 6.873382 | -1.54924 |
| 132 | H | 50 | 49 | 48 | 1.100303 | 109.2495 | -57.7617 | 11.61558 | 6.311756 | 0.722251 |

|     |   |    |    |    |          |          |          |          |          |          |
|-----|---|----|----|----|----------|----------|----------|----------|----------|----------|
| 133 | H | 50 | 49 | 48 | 1.100311 | 109.2484 | 57.71866 | 10.06752 | 7.002094 | 0.260097 |
| 134 | H | 51 | 50 | 49 | 1.100244 | 109.2561 | -57.7655 | 9.858767 | 5.300717 | -1.5831  |
| 135 | H | 51 | 50 | 49 | 1.100243 | 109.2552 | 57.71859 | 11.40698 | 4.610572 | -1.1217  |
| 136 | H | 52 | 51 | 50 | 1.100281 | 109.2574 | -57.795  | 10.48017 | 4.048558 | 1.149824 |
| 137 | H | 52 | 51 | 50 | 1.10029  | 109.2559 | 57.6936  | 8.932026 | 4.739855 | 0.689543 |
| 138 | H | 53 | 52 | 51 | 1.100206 | 109.2572 | -57.7856 | 8.72069  | 3.040156 | -1.15468 |
| 139 | H | 53 | 52 | 51 | 1.100248 | 109.2555 | 57.70549 | 10.26925 | 2.349074 | -0.69571 |
| 140 | H | 54 | 53 | 52 | 1.100292 | 109.2611 | -57.8289 | 9.344963 | 1.784649 | 1.576031 |
| 141 | H | 54 | 53 | 52 | 1.100261 | 109.2593 | 57.67477 | 7.796535 | 2.477486 | 1.118658 |
| 142 | H | 55 | 54 | 53 | 1.100392 | 109.2208 | -57.798  | 7.581538 | 0.780948 | -0.72718 |
| 143 | H | 55 | 54 | 53 | 1.100242 | 109.2668 | 57.69398 | 9.130375 | 0.08762  | -0.27145 |
| 144 | H | 56 | 55 | 54 | 1.100295 | 109.2532 | -57.5926 | 8.206869 | -0.47538 | 2.002931 |
| 145 | H | 56 | 55 | 54 | 1.100322 | 109.2487 | 57.9076  | 6.657573 | 0.214082 | 1.542956 |
| 146 | H | 57 | 56 | 55 | 1.100247 | 109.2746 | -57.8685 | 6.447519 | -1.4858  | -0.3009  |
| 147 | H | 57 | 56 | 55 | 1.100233 | 109.2522 | 57.65208 | 7.998213 | -2.17391 | 0.156208 |
| 148 | H | 58 | 57 | 56 | 1.100298 | 109.2504 | -57.5182 | 7.075599 | -2.73609 | 2.431165 |
| 149 | H | 58 | 57 | 56 | 1.100253 | 109.257  | 57.99005 | 5.524181 | -2.05279 | 1.969174 |
| 150 | H | 59 | 58 | 57 | 1.100091 | 109.2912 | -57.8964 | 5.321371 | -3.75677 | 0.128064 |
| 151 | H | 59 | 58 | 57 | 1.100186 | 109.2453 | 57.63911 | 6.874488 | -4.43793 | 0.587076 |
| 152 | H | 60 | 59 | 58 | 1.100365 | 109.2849 | -57.6263 | 5.955286 | -5.00157 | 2.862086 |
| 153 | H | 60 | 59 | 58 | 1.100424 | 109.2767 | 57.86279 | 4.401646 | -4.32262 | 2.402236 |
| 154 | H | 61 | 60 | 59 | 1.098583 | 109.1578 | -58.6441 | 4.19044  | -6.02677 | 0.573156 |
| 155 | H | 61 | 60 | 59 | 1.100148 | 109.2688 | 56.65151 | 5.752489 | -6.69805 | 1.00422  |
| 156 | H | 62 | 61 | 60 | 1.098498 | 107.7424 | -59.9204 | 4.940144 | -7.29614 | 3.257166 |
| 157 | H | 62 | 61 | 60 | 1.099753 | 109.7815 | 54.48632 | 3.365533 | -6.60605 | 2.931406 |
| 158 | H | 63 | 62 | 61 | 1.098965 | 109.105  | 142.9202 | 3.920703 | -9.26154 | 2.650242 |

|     |   |    |    |    |          |          |          |          |          |          |
|-----|---|----|----|----|----------|----------|----------|----------|----------|----------|
| 159 | H | 46 | 11 | 9  | 1.098529 | 110.4566 | -63.2377 | -7.09835 | 6.375614 | 1.559703 |
| 160 | H | 63 | 62 | 61 | 1.099677 | 109.5167 | 28.06809 | 4.372409 | -8.76306 | 1.036266 |

**Total Energy: -2620.474156 au**

### 3. DcTa-da

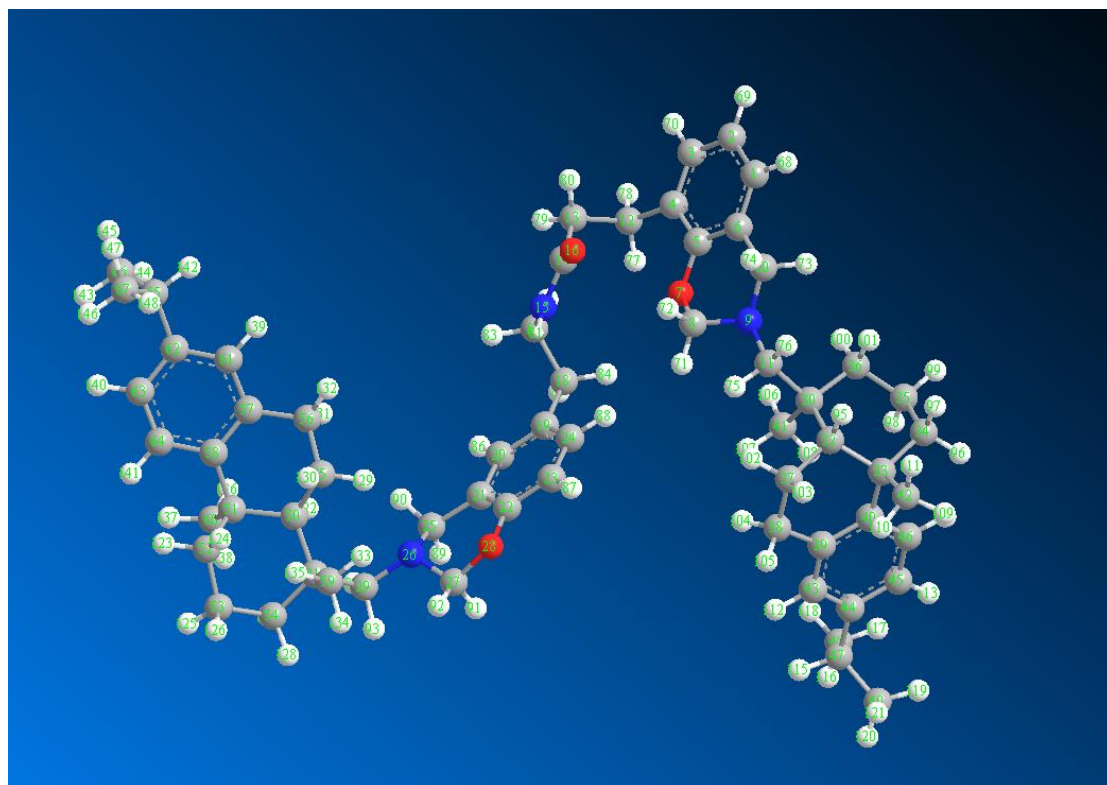

#### Atomic Coordinates of the Atoms.

| Tag | Symbol | NA | NB | NC | Bond | Angle | Dihedral | X | Y | Z |
|-----|--------|----|----|----|------|-------|----------|---|---|---|
|-----|--------|----|----|----|------|-------|----------|---|---|---|

|    |   |    |    |    |          |          |          |          |          |          |
|----|---|----|----|----|----------|----------|----------|----------|----------|----------|
| 1  | C |    |    |    |          |          |          | 4.904107 | 6.482341 | 0.327668 |
| 2  | C | 1  |    |    | 1.391912 |          |          | 4.320673 | 7.422479 | -0.51682 |
| 3  | C | 2  | 1  |    | 1.396423 | 119.4574 |          | 3.299708 | 7.027043 | -1.38357 |
| 4  | C | 3  | 2  | 1  | 1.396348 | 121.4184 | 0.292219 | 2.844974 | 5.707277 | -1.41853 |
| 5  | C | 4  | 3  | 2  | 1.40526  | 117.9765 | -0.90226 | 3.459837 | 4.775346 | -0.56518 |
| 6  | C | 1  | 2  | 3  | 1.39802  | 120.8474 | 0.381447 | 4.486335 | 5.148287 | 0.312658 |
| 7  | O | 5  | 4  | 3  | 1.372963 | 117.2174 | -178.581 | 3.021048 | 3.476195 | -0.63373 |
| 8  | C | 7  | 5  | 4  | 1.424287 | 113.6454 | -159.798 | 3.334299 | 2.70569  | 0.522469 |
| 9  | N | 8  | 7  | 5  | 1.447218 | 110.7178 | -53.8462 | 4.751125 | 2.768033 | 0.810841 |
| 10 | C | 9  | 8  | 7  | 1.461367 | 109.9925 | 67.68394 | 5.116826 | 4.119588 | 1.229357 |
| 11 | C | 9  | 8  | 7  | 1.468832 | 114.668  | -161.068 | 5.246758 | 1.69595  | 1.684026 |
| 12 | C | 4  | 3  | 2  | 1.512379 | 120.9785 | 177.441  | 1.700041 | 5.302023 | -2.31975 |
| 13 | C | 12 | 4  | 3  | 1.555192 | 113.8746 | -92.0607 | 0.30486  | 5.375476 | -1.63659 |
| 14 | C | 13 | 12 | 4  | 1.52757  | 114.8593 | -70.0568 | 0.060034 | 4.318713 | -0.56106 |
| 15 | N | 14 | 13 | 12 | 1.372934 | 118.0063 | -88.1487 | -0.45765 | 3.108741 | -0.95211 |
| 16 | O | 14 | 13 | 12 | 1.22732  | 121.5462 | 93.36546 | 0.288941 | 4.543235 | 0.623641 |
| 17 | C | 15 | 14 | 13 | 1.452738 | 130.1129 | 8.450781 | -0.68027 | 2.572291 | -2.28369 |
| 18 | C | 17 | 15 | 14 | 1.545886 | 112.5774 | 121.6665 | 0.072227 | 1.243022 | -2.5215  |
| 19 | C | 18 | 17 | 15 | 1.514423 | 113.4128 | 64.7217  | -0.4116  | 0.11142  | -1.63896 |
| 20 | C | 19 | 18 | 17 | 1.399751 | 120.7756 | 82.51364 | -1.54567 | -0.63236 | -1.98534 |
| 21 | C | 20 | 19 | 18 | 1.396839 | 122.2918 | -178.052 | -2.04277 | -1.65602 | -1.17529 |
| 22 | C | 21 | 20 | 19 | 1.402806 | 118.4792 | -0.41482 | -1.37121 | -1.94811 | 0.021182 |
| 23 | C | 22 | 21 | 20 | 1.397275 | 120.4479 | 0.948235 | -0.24324 | -1.21427 | 0.39741  |
| 24 | C | 23 | 22 | 21 | 1.391592 | 119.8033 | -0.77152 | 0.22706  | -0.19717 | -0.42774 |
| 25 | C | 21 | 20 | 19 | 1.514945 | 121.7644 | 178.8214 | -3.28653 | -2.43603 | -1.54904 |
| 26 | N | 25 | 21 | 20 | 1.462515 | 109.861  | -163.342 | -3.7985  | -3.14609 | -0.37744 |

|    |   |    |    |    |          |          |          |          |          |          |
|----|---|----|----|----|----------|----------|----------|----------|----------|----------|
| 27 | C | 26 | 25 | 21 | 1.446514 | 109.7517 | -48.3123 | -2.71841 | -3.85084 | 0.277642 |
| 28 | O | 22 | 21 | 20 | 1.368688 | 121.9628 | -179.301 | -1.78786 | -2.94523 | 0.861104 |
| 29 | C | 26 | 25 | 21 | 1.470291 | 114.7146 | -178.457 | -4.98997 | -3.96975 | -0.62991 |
| 30 | C | 11 | 9  | 8  | 1.559545 | 113.9823 | 116.4922 | 6.286947 | 0.754103 | 1.003503 |
| 31 | C | 29 | 26 | 25 | 1.556893 | 116.0987 | -122.491 | -6.24513 | -3.64038 | 0.230318 |
| 32 | C | 30 | 11 | 9  | 1.576684 | 107.7413 | 175.0272 | 6.812542 | -0.25177 | 2.097986 |
| 33 | C | 32 | 30 | 11 | 1.571317 | 116.0069 | -164.95  | 8.120391 | -1.04344 | 1.734894 |
| 34 | C | 33 | 32 | 30 | 1.547998 | 109.1052 | 48.06936 | 9.178434 | -0.05229 | 1.19225  |
| 35 | C | 34 | 33 | 32 | 1.528159 | 113.9748 | -52.7314 | 8.676555 | 0.826269 | 0.047032 |
| 36 | C | 35 | 34 | 33 | 1.529841 | 109.5593 | 58.76349 | 7.464563 | 1.634267 | 0.51461  |
| 37 | C | 32 | 30 | 11 | 1.546789 | 115.8566 | 64.91776 | 5.763758 | -1.2338  | 2.670899 |
| 38 | C | 37 | 32 | 30 | 1.542445 | 115.3238 | 80.86367 | 5.474356 | -2.47268 | 1.798801 |
| 39 | C | 38 | 37 | 32 | 1.518609 | 115.8318 | 25.92685 | 6.597203 | -2.90737 | 0.873362 |
| 40 | C | 39 | 38 | 37 | 1.407102 | 122.655  | -1.50066 | 7.818061 | -2.21364 | 0.782909 |
| 41 | C | 30 | 11 | 9  | 1.542573 | 107.914  | -59.9595 | 5.607866 | 0.100957 | -0.21788 |
| 42 | C | 33 | 32 | 30 | 1.554918 | 109.5931 | 163.9754 | 8.728569 | -1.66488 | 3.023966 |
| 43 | C | 39 | 38 | 37 | 1.402054 | 117.734  | -179.797 | 6.375151 | -4.02697 | 0.05915  |
| 44 | C | 43 | 39 | 38 | 1.395076 | 122.8809 | 178.5684 | 7.320521 | -4.50141 | -0.85048 |
| 45 | C | 44 | 43 | 39 | 1.401291 | 117.1326 | -0.18301 | 8.533537 | -3.80473 | -0.93328 |
| 46 | C | 45 | 44 | 43 | 1.391475 | 120.748  | 0.179393 | 8.770707 | -2.69161 | -0.13271 |
| 47 | C | 44 | 43 | 39 | 1.522519 | 120.9789 | -179.978 | 7.033377 | -5.72185 | -1.71426 |
| 48 | C | 47 | 44 | 43 | 1.540467 | 111.8464 | 117.0279 | 7.022559 | -5.37257 | -3.21457 |
| 49 | C | 47 | 44 | 43 | 1.540426 | 111.8829 | -117.753 | 8.013071 | -6.87446 | -1.42338 |
| 50 | C | 31 | 29 | 26 | 1.588773 | 109.664  | 64.46418 | -6.75957 | -2.17694 | -0.11303 |
| 51 | C | 50 | 31 | 29 | 1.586938 | 115.3401 | 141.3001 | -8.33646 | -2.00457 | -0.15854 |
| 52 | C | 51 | 50 | 31 | 1.549765 | 108.981  | 30.20831 | -8.98196 | -3.00784 | 0.830694 |



|    |   |    |    |    |          |          |          |          |          |          |
|----|---|----|----|----|----------|----------|----------|----------|----------|----------|
| 53 | C | 52 | 51 | 50 | 1.543112 | 113.957  | -60.29   | -8.67441 | -4.48635 | 0.513515 |
| 54 | C | 53 | 52 | 51 | 1.541987 | 113.5768 | 30.79957 | -7.30103 | -4.70121 | -0.15387 |
| 55 | C | 50 | 31 | 29 | 1.538766 | 111.884  | -88.7109 | -6.08067 | -1.10996 | 0.763584 |
| 56 | C | 55 | 50 | 31 | 1.525825 | 110.8177 | 171.4652 | -6.42965 | 0.293593 | 0.277382 |
| 57 | C | 56 | 55 | 50 | 1.508942 | 110.3028 | 60.41062 | -7.92084 | 0.514779 | 0.343113 |
| 58 | C | 57 | 56 | 55 | 1.405302 | 120.1173 | -29.6022 | -8.80193 | -0.56916 | 0.189411 |
| 59 | C | 31 | 29 | 26 | 1.545553 | 108.377  | -59.8345 | -5.87818 | -3.8289  | 1.719795 |
| 60 | C | 51 | 50 | 31 | 1.554726 | 109.3743 | -90.6832 | -8.84222 | -2.26502 | -1.60545 |
| 61 | C | 57 | 56 | 55 | 1.402016 | 119.8521 | 148.7029 | -8.42555 | 1.798623 | 0.593426 |
| 62 | C | 61 | 57 | 56 | 1.394741 | 122.7307 | -178.774 | -9.79085 | 2.066315 | 0.691447 |
| 63 | C | 62 | 61 | 57 | 1.401882 | 117.065  | 0.240264 | -10.6663 | 0.982911 | 0.532867 |
| 64 | C | 63 | 62 | 61 | 1.390515 | 120.778  | -0.04959 | -10.1786 | -0.29604 | 0.288024 |
| 65 | C | 62 | 61 | 57 | 1.522349 | 121.036  | 179.936  | -10.2966 | 3.475707 | 0.965964 |
| 66 | C | 65 | 62 | 61 | 1.540484 | 111.855  | 117.7558 | -11.1597 | 4.011017 | -0.19233 |
| 67 | C | 65 | 62 | 61 | 1.540443 | 111.8809 | -117.023 | -11.0542 | 3.563241 | 2.304359 |
| 68 | H | 1  | 2  | 3  | 1.088306 | 120.0918 | 179.8537 | 5.702205 | 6.778723 | 1.005612 |
| 69 | H | 2  | 1  | 6  | 1.086217 | 120.3002 | -179.398 | 4.658867 | 8.454634 | -0.50469 |
| 70 | H | 3  | 2  | 1  | 1.088123 | 119.773  | 179.8152 | 2.837936 | 7.758384 | -2.04382 |
| 71 | H | 8  | 7  | 5  | 1.091032 | 105.8513 | -172.355 | 3.057949 | 1.678488 | 0.279905 |
| 72 | H | 8  | 7  | 5  | 1.105893 | 107.4971 | 70.61169 | 2.699703 | 3.07441  | 1.349713 |
| 73 | H | 10 | 9  | 8  | 1.095741 | 108.7828 | -165.815 | 6.207839 | 4.215929 | 1.196834 |
| 74 | H | 10 | 9  | 8  | 1.109608 | 111.6017 | 76.83186 | 4.811797 | 4.319298 | 2.277357 |
| 75 | H | 11 | 9  | 8  | 1.098015 | 109.0623 | -6.27406 | 4.394942 | 1.103742 | 2.04366  |
| 76 | H | 11 | 9  | 8  | 1.100173 | 109.1648 | -121.409 | 5.701197 | 2.141949 | 2.581217 |
| 77 | H | 12 | 4  | 3  | 1.095156 | 110.1401 | 144.0301 | 1.868693 | 4.294149 | -2.71359 |
| 78 | H | 12 | 4  | 3  | 1.096555 | 108.514  | 27.34545 | 1.677524 | 5.980777 | -3.18069 |

|     |   |    |    |    |          |          |          |          |          |          |
|-----|---|----|----|----|----------|----------|----------|----------|----------|----------|
| 79  | H | 13 | 12 | 4  | 1.096262 | 108.8579 | 165.2292 | -0.47109 | 5.328102 | -2.40955 |
| 80  | H | 13 | 12 | 4  | 1.093246 | 108.917  | 48.3284  | 0.20746  | 6.340628 | -1.13243 |
| 81  | H | 15 | 14 | 13 | 1.014328 | 112.8668 | -179.288 | -0.59926 | 2.471242 | -0.17596 |
| 82  | H | 17 | 15 | 14 | 1.091378 | 108.8318 | 0.787129 | -0.34533 | 3.305517 | -3.01942 |
| 83  | H | 17 | 15 | 14 | 1.1002   | 110.1359 | -116.362 | -1.75556 | 2.411995 | -2.45254 |
| 84  | H | 18 | 17 | 15 | 1.096218 | 108.2431 | -58.0707 | 1.141965 | 1.4208   | -2.36103 |
| 85  | H | 18 | 17 | 15 | 1.097855 | 107.655  | -173.718 | -0.05808 | 0.970876 | -3.57707 |
| 86  | H | 20 | 19 | 18 | 1.089706 | 119.1944 | 1.686671 | -2.06542 | -0.4067  | -2.91614 |
| 87  | H | 23 | 22 | 21 | 1.08556  | 118.7118 | 179.8055 | 0.252775 | -1.46216 | 1.330659 |
| 88  | H | 24 | 23 | 22 | 1.08718  | 119.3156 | -179.197 | 1.113054 | 0.360037 | -0.13364 |
| 89  | H | 25 | 21 | 20 | 1.109855 | 110.1197 | 73.20105 | -3.06448 | -3.1307  | -2.38565 |
| 90  | H | 25 | 21 | 20 | 1.09583  | 109.6711 | -43.8816 | -4.05943 | -1.7476  | -1.90895 |
| 91  | H | 27 | 26 | 25 | 1.109345 | 112.2884 | -53.5285 | -2.16319 | -4.51147 | -0.41946 |
| 92  | H | 27 | 26 | 25 | 1.089983 | 110.042  | -175.244 | -3.10801 | -4.44898 | 1.101361 |
| 93  | H | 29 | 26 | 25 | 1.102462 | 109.6664 | 114.7353 | -4.74367 | -5.03399 | -0.48104 |
| 94  | H | 29 | 26 | 25 | 1.09814  | 108.5556 | -0.05619 | -5.26086 | -3.87674 | -1.69005 |
| 95  | H | 32 | 30 | 11 | 1.1019   | 103.9907 | -50.7301 | 7.105869 | 0.398072 | 2.93813  |
| 96  | H | 34 | 33 | 32 | 1.095753 | 110.4482 | -178.89  | 10.09443 | -0.58499 | 0.913208 |
| 97  | H | 34 | 33 | 32 | 1.100152 | 107.1121 | 66.91258 | 9.466352 | 0.603252 | 2.027537 |
| 98  | H | 35 | 34 | 33 | 1.097112 | 110.3999 | -63.5375 | 8.421654 | 0.210147 | -0.82422 |
| 99  | H | 35 | 34 | 33 | 1.097824 | 109.8586 | 179.4069 | 9.473942 | 1.50754  | -0.27741 |
| 100 | H | 36 | 35 | 34 | 1.095597 | 111.1316 | 178.2718 | 7.101838 | 2.297116 | -0.27873 |
| 101 | H | 36 | 35 | 34 | 1.101621 | 107.8229 | 61.75005 | 7.791054 | 2.283127 | 1.342833 |
| 102 | H | 37 | 32 | 30 | 1.09495  | 110.9033 | -43.6884 | 4.821321 | -0.71855 | 2.883602 |
| 103 | H | 37 | 32 | 30 | 1.094991 | 107.3053 | -157.768 | 6.129527 | -1.56774 | 3.647476 |
| 104 | H | 38 | 37 | 32 | 1.097365 | 110.0454 | -96.4993 | 4.582748 | -2.29925 | 1.183037 |

|     |   |    |    |    |          |          |          |          |          |          |
|-----|---|----|----|----|----------|----------|----------|----------|----------|----------|
| 105 | H | 38 | 37 | 32 | 1.098806 | 108.8376 | 149.1142 | 5.205255 | -3.31275 | 2.453974 |
| 106 | H | 41 | 30 | 11 | 1.095385 | 108.872  | 59.32335 | 5.280849 | 0.888933 | -0.90492 |
| 107 | H | 41 | 30 | 11 | 1.095209 | 111.8258 | -59.3933 | 4.722257 | -0.47609 | 0.068827 |
| 108 | H | 41 | 30 | 11 | 1.091904 | 112.7318 | 179.3947 | 6.274606 | -0.57096 | -0.76216 |
| 109 | H | 42 | 33 | 32 | 1.096128 | 109.727  | -172.639 | 9.706445 | -2.10491 | 2.796763 |
| 110 | H | 42 | 33 | 32 | 1.093508 | 112.6595 | 68.21485 | 8.107323 | -2.46245 | 3.440732 |
| 111 | H | 42 | 33 | 32 | 1.097825 | 110.9439 | -53.4483 | 8.873507 | -0.89975 | 3.797787 |
| 112 | H | 43 | 39 | 38 | 1.090007 | 118.2896 | -1.21108 | 5.419158 | -4.5441  | 0.141414 |
| 113 | H | 45 | 44 | 43 | 1.08753  | 120.1974 | -179.82  | 9.304665 | -4.12969 | -1.62789 |
| 114 | H | 46 | 45 | 44 | 1.084996 | 118.0436 | 179.7742 | 9.726545 | -2.18753 | -0.23015 |
| 115 | H | 47 | 44 | 43 | 1.098828 | 107.066  | -0.3516  | 6.025855 | -6.07302 | -1.45157 |
| 116 | H | 48 | 47 | 44 | 1.096777 | 110.7142 | -176.765 | 6.757889 | -6.25107 | -3.8155  |
| 117 | H | 48 | 47 | 44 | 1.09656  | 111.2544 | 63.55907 | 8.007436 | -5.02524 | -3.54896 |
| 118 | H | 48 | 47 | 44 | 1.095482 | 111.1733 | -56.4674 | 6.298626 | -4.57936 | -3.43095 |
| 119 | H | 49 | 47 | 44 | 1.09656  | 111.2705 | -63.5957 | 9.0425   | -6.59537 | -1.67799 |
| 120 | H | 49 | 47 | 44 | 1.096764 | 110.7067 | 176.7386 | 7.753674 | -7.76205 | -2.01311 |
| 121 | H | 49 | 47 | 44 | 1.095488 | 111.1818 | 56.44974 | 7.995459 | -7.15097 | -0.36351 |
| 122 | H | 50 | 31 | 29 | 1.100482 | 105.6064 | 25.69611 | -6.41896 | -1.97677 | -1.14015 |
| 123 | H | 52 | 51 | 50 | 1.094417 | 110.4012 | 176.9259 | -10.0675 | -2.87149 | 0.858317 |
| 124 | H | 52 | 51 | 50 | 1.096764 | 107.782  | 62.24699 | -8.63049 | -2.75723 | 1.838939 |
| 125 | H | 53 | 52 | 51 | 1.096688 | 109.9351 | -91.314  | -9.45262 | -4.89823 | -0.14029 |
| 126 | H | 53 | 52 | 51 | 1.096558 | 108.5469 | 153.4847 | -8.73307 | -5.06236 | 1.444756 |
| 127 | H | 54 | 53 | 52 | 1.096973 | 109.8544 | -93.62   | -7.41408 | -4.7085  | -1.24498 |
| 128 | H | 54 | 53 | 52 | 1.098328 | 109.583  | 151.1038 | -6.91766 | -5.69732 | 0.105177 |
| 129 | H | 55 | 50 | 31 | 1.093228 | 109.1499 | 49.45905 | -4.9987  | -1.26529 | 0.744217 |
| 130 | H | 55 | 50 | 31 | 1.09781  | 110.4436 | -68.2222 | -6.40513 | -1.20836 | 1.807724 |

|     |   |    |    |    |          |          |          |          |          |          |
|-----|---|----|----|----|----------|----------|----------|----------|----------|----------|
| 131 | H | 56 | 55 | 50 | 1.102074 | 109.4658 | -61.3261 | -6.06573 | 0.425903 | -0.75443 |
| 132 | H | 56 | 55 | 50 | 1.096981 | 110.6576 | -177.803 | -5.91346 | 1.051298 | 0.879711 |
| 133 | H | 59 | 31 | 29 | 1.092794 | 111.8656 | 58.54224 | -5.04288 | -3.19011 | 2.017168 |
| 134 | H | 59 | 31 | 29 | 1.098114 | 109.6654 | -61.0673 | -5.58469 | -4.87179 | 1.898955 |
| 135 | H | 59 | 31 | 29 | 1.09361  | 112.4907 | 179.8578 | -6.71621 | -3.61133 | 2.387886 |
| 136 | H | 60 | 51 | 50 | 1.096094 | 110.1313 | -64.5553 | -8.44548 | -1.50339 | -2.28658 |
| 137 | H | 60 | 51 | 50 | 1.095293 | 111.0945 | 176.6401 | -9.93501 | -2.21163 | -1.65666 |
| 138 | H | 60 | 51 | 50 | 1.093161 | 112.7797 | 55.72634 | -8.54047 | -3.24293 | -1.9897  |
| 139 | H | 61 | 57 | 56 | 1.08947  | 118.2339 | 0.832496 | -7.71604 | 2.615345 | 0.721879 |
| 140 | H | 63 | 62 | 61 | 1.087565 | 120.1762 | 179.9133 | -11.7411 | 1.134076 | 0.600969 |
| 141 | H | 64 | 63 | 62 | 1.0863   | 117.9574 | -179.384 | -10.8981 | -1.10011 | 0.162501 |
| 142 | H | 65 | 62 | 61 | 1.098729 | 107.0534 | 0.375437 | -9.41388 | 4.125105 | 1.045118 |
| 143 | H | 66 | 65 | 62 | 1.096613 | 111.279  | 63.59436 | -12.0703 | 3.413387 | -0.31926 |
| 144 | H | 66 | 65 | 62 | 1.095504 | 111.1793 | -56.4632 | -10.6102 | 3.986121 | -1.1397  |
| 145 | H | 66 | 65 | 62 | 1.09673  | 110.6975 | -176.738 | -11.4656 | 5.046738 | -0.00124 |
| 146 | H | 67 | 65 | 62 | 1.096609 | 111.2624 | -63.5585 | -11.9599 | 2.945036 | 2.289848 |
| 147 | H | 67 | 65 | 62 | 1.096739 | 110.7051 | 176.7613 | -11.3598 | 4.596271 | 2.510158 |
| 148 | H | 67 | 65 | 62 | 1.09544  | 111.1711 | 56.48784 | -10.4294 | 3.21945  | 3.135875 |

**Total Energy: -2763.227827 au**
